# Supplementary material for: Towards quantifying the reciprocal associations between frequency of cannabis use and alcohol consumption: a cross-lagged analysis from the CONSTANCES cohort
Source: HighWire-hosted journal article supplement (doi:10.1136/bmjopen-2021-052819), 2022-02-01

**Supplemental Table 1. Comparison of the characteristics of responders at baseline, non-responders at follow-up and included participants.**

| CATEGORICAL VARIABLES                                               | Responders at baseline |      | Non-responders to the entire questionnaire at follow-up |      | Non-responders to the questions related to substance use at follow-up |      | Included participants |      |
|---------------------------------------------------------------------|------------------------|------|---------------------------------------------------------|------|-----------------------------------------------------------------------|------|-----------------------|------|
|                                                                     | N                      | %    | N                                                       | %    | N                                                                     | %    | N                     | %    |
|                                                                     | <b>37,588</b>          | 100  | <b>9,276</b>                                            | 24.7 | <b>1,361</b>                                                          | 3.6  | <b>26,951</b>         | 71.7 |
| <b>Education level<sup>1</sup></b>                                  |                        |      |                                                         |      |                                                                       |      |                       |      |
| Early childhood education and primary education                     | 764                    | 2.1  | 336                                                     | 3.7  | 72                                                                    | 5.5  | 358                   | 1.3  |
| Lower secondary education                                           | 1756                   | 4.7  | 499                                                     | 5.5  | 133                                                                   | 10.1 | 1151                  | 4.3  |
| Upper secondary education and post-secondary non-tertiary education | 12176                  | 32.8 | 3440                                                    | 37.6 | 556                                                                   | 42.4 | 8267                  | 30.7 |
| Short-cycle tertiary education and Bachelor's or equivalent level   | 13122                  | 35.3 | 2998                                                    | 32.8 | 378                                                                   | 28.8 | 9873                  | 36.6 |
| Master's or equivalent level and Doctoral or equivalent level       | 9307                   | 25.1 | 1869                                                    | 20.4 | 173                                                                   | 13.2 | 7302                  | 27.1 |
| <b>Household income (in euros per month)</b>                        |                        |      |                                                         |      |                                                                       |      |                       |      |
| Less than 2100                                                      | 7007                   | 20.0 | 2443                                                    | 28.8 | 391                                                                   | 31.7 | 4423                  | 16.4 |
| From 2100 to 2800                                                   | 5352                   | 15.3 | 1476                                                    | 17.4 | 234                                                                   | 19.0 | 4084                  | 15.2 |
| From 2800 to 4200                                                   | 11490                  | 32.8 | 2549                                                    | 30.1 | 362                                                                   | 29.3 | 9140                  | 33.9 |
| More than 4200                                                      | 11212                  | 32.2 | 2007                                                    | 23.7 | 247                                                                   | 20.0 | 9304                  | 34.5 |
| <b>Marital status</b>                                               |                        |      |                                                         |      |                                                                       |      |                       |      |
| Living with a partner                                               | 26511                  | 71.5 | 6098                                                    | 67.0 | 874                                                                   | 66.9 | 19744                 | 73.3 |
| Single                                                              | 10550                  | 28.5 | 3004                                                    | 33.0 | 31.8                                                                  | 33.1 | 7207                  | 26.7 |
| <b>Alcohol use risk categories<sup>2</sup></b>                      |                        |      |                                                         |      |                                                                       |      |                       |      |
| Low                                                                 | 34843                  | 92.7 | 6545                                                    | 80.8 | 1312                                                                  | 96.4 | 24631                 | 91.4 |
| Moderate                                                            | 2039                   | 5.4  | 1275                                                    | 15.7 | 41                                                                    | 3.0  | 1797                  | 6.7  |
| High                                                                | 706                    | 1.9  | 284                                                     | 3.5  | 8                                                                     | 0.6  | 523                   | 1.9  |
| <b>Cannabis frequency of use</b>                                    |                        |      |                                                         |      |                                                                       |      |                       |      |
| Not in the past 12 months                                           | 34225                  | 91.1 | 8051                                                    | 86.8 | 1295                                                                  | 95.2 | 24875                 | 92.3 |

|                                                 |             |           |             |           |             |           |             |           |
|-------------------------------------------------|-------------|-----------|-------------|-----------|-------------|-----------|-------------|-----------|
| In the past 12 months but not in the past month | 2477        | 6.6       | 461         | 5.0       | 22          | 1.6       | 1088        | 4.0       |
| In the past month                               | 886         | 2.4       | 762         | 8.2       | 44          | 3.2       | 988         | 3.7       |
| <b>CONTINUOUS VARIABLES</b>                     | <b>Mean</b> | <b>SD</b> | <b>Mean</b> | <b>SD</b> | <b>Mean</b> | <b>SD</b> | <b>Mean</b> | <b>SD</b> |
| Age                                             | 46.8        | 13.6      | 44.0        | 13.7      | 51.5        | 13.4      | 47.5        | 13.4      |
| Number of cigarettes per day                    | 1.8         | 4.9       | 2.8         | 6.1       | 1.6         | 5.0       | 1.4         | 4.4       |
| CESD total score                                | 14.3        | 5.6       | 14.9        | 6.4       | 14.7        | 6.8       | 14.1        | 5.3       |
| Self-rated health status <sup>3</sup>           | 2.8         | 1.4       | 2.9         | 1.5       | 3.0         | 1.5       | 2.7         | 1.3       |

SD: Standard Deviation. CESD: Center of Epidemiologic Studies Depression scale. <sup>1</sup>According to the 2011 ISCED classification; <sup>2</sup>According to the 2000 WHO guidelines as follows: low risk ( $\leq 28$  drinks per week in men;  $\leq 14$  drinks per week in women), moderate risk ( $> 28$  and  $\leq 42$  in men;  $> 14$  and  $\leq 28$  in women) and high risk ( $> 42$  in men;  $> 28$  in women); <sup>3</sup>From 1="Very good general health" to 8="Very poor general health". Except for alcohol, tobacco and cannabis use, responders had missing data for the other covariables whereas those missing data have been imputed for included participants.

Supplemental Table 2. Total effects standardized coefficients for all covariables (n=26,951).

|                                  | Age      | Sex      | Education | Marital status | Household income | Self-rated health | Depressive symptoms | Number of cigarettes per day | Cannabis use at baseline | Alcohol use at baseline |
|----------------------------------|----------|----------|-----------|----------------|------------------|-------------------|---------------------|------------------------------|--------------------------|-------------------------|
| <b>Alcohol use at baseline</b>   |          |          |           |                |                  |                   |                     |                              |                          |                         |
| Standardized coefficient         | 0.0837   | 0.0227   | -0.003051 | -0.0368        | -0.005158        | 0.0181            | 0.0355              | 0.1445                       | .                        | .                       |
| Standard error                   | 0.006711 | 0.006113 | 0.007322  | 0.007556       | -0.6271          | 0.006583          | 0.006966            | 0.009636                     | .                        | .                       |
| p-value                          | <0.001   | 0.000202 | 0.6769    | <0.001         | 0.5306           | 0.005944          | <0.001              | <0.001                       | .                        | .                       |
| <b>Alcohol use at follow-up</b>  |          |          |           |                |                  |                   |                     |                              |                          |                         |
| Standardized coefficient         | 0.0217   | 0.003410 | 0.0000944 | -0.0183        | -0.005682        | 0.006968          | 0.0172              | 0.0774                       | 0.0637                   | 0.4364                  |
| Standard error                   | 0.003690 | 0.002828 | 0.003277  | 0.003427       | 0.003726         | 0.002960          | 0.003149            | 0.004991                     | 0.007774                 | 0.009931                |
| p-value                          | <0.001   | 0.2279   | 0.9770    | <0.001         | 0.1273           | 0.0186            | <0.001              | <0.001                       | <0.001                   | <0.001                  |
| <b>Cannabis use at baseline</b>  |          |          |           |                |                  |                   |                     |                              |                          |                         |
| Standardized coefficient         | -0.2331  | -0.1021  | 0.0224    | -0.0347        | -0.0538          | -0.0147           | 0.0269              | 0.2245                       | .                        | .                       |
| Standard error                   | 0.005627 | 0.005603 | 0.006739  | 0.007474       | 0.007857         | 0.005827          | 0.005909            | 0.008792                     | .                        | .                       |
| p-value                          | <0.001   | <0.001   | 0.000901  | <0.001         | <0.001           | 0.0117            | <0.001              | <0.001                       | .                        | .                       |
| <b>Cannabis use at follow-up</b> |          |          |           |                |                  |                   |                     |                              |                          |                         |
| Standardized coefficient         | -0.1834  | -0.0806  | 0.0177    | -0.0282        | -0.0428          | -0.0113           | 0.0220              | 0.1806                       | 0.7930                   | 0.0176                  |
| Standard error                   | 0.004784 | 0.004579 | 0.005354  | 0.005954       | 0.006272         | 0.004640          | 0.004727            | 0.007423                     | 0.007006                 | 0.005983                |
| p-value                          | <0.001   | <0.001   | 0.000955  | <0.001         | <0.001           | 0.0146            | <0.001              | <0.001                       | <0.001                   | 0.003269                |

**Supplemental Figure 1. Cross-lagged associations between frequency of cannabis use and alcohol consumption in 26,951 participants, enrolled in 2015 or 2016 in the CONSTANCES cohort and while introducing both outcomes as binary variables. Results on unidirectional arrows are standardized coefficients  $\pm$  their standard errors. Results on bidirectional arrows are residual correlations. The follow-up period was one year.**

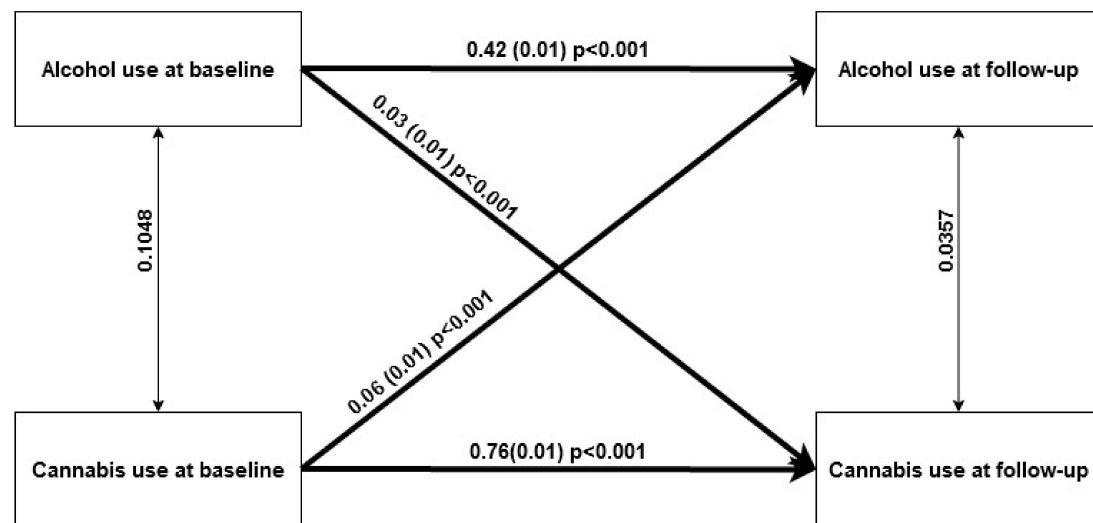

Supplement: bmjopen-2021-052819supp001_data_supplement.pdf [file bmjopen-2021-052819supp001_data_supplement.pdf]
